# Supplementary material for: Long-Term Feeding of a High-Fat Diet Ameliorated Age-Related Phenotypes in SAMP8 Mice
Source: MDPI journal article supplement (doi:10.3390/nu12051416), 2020-05-14
Supplement: s1 [file s1]

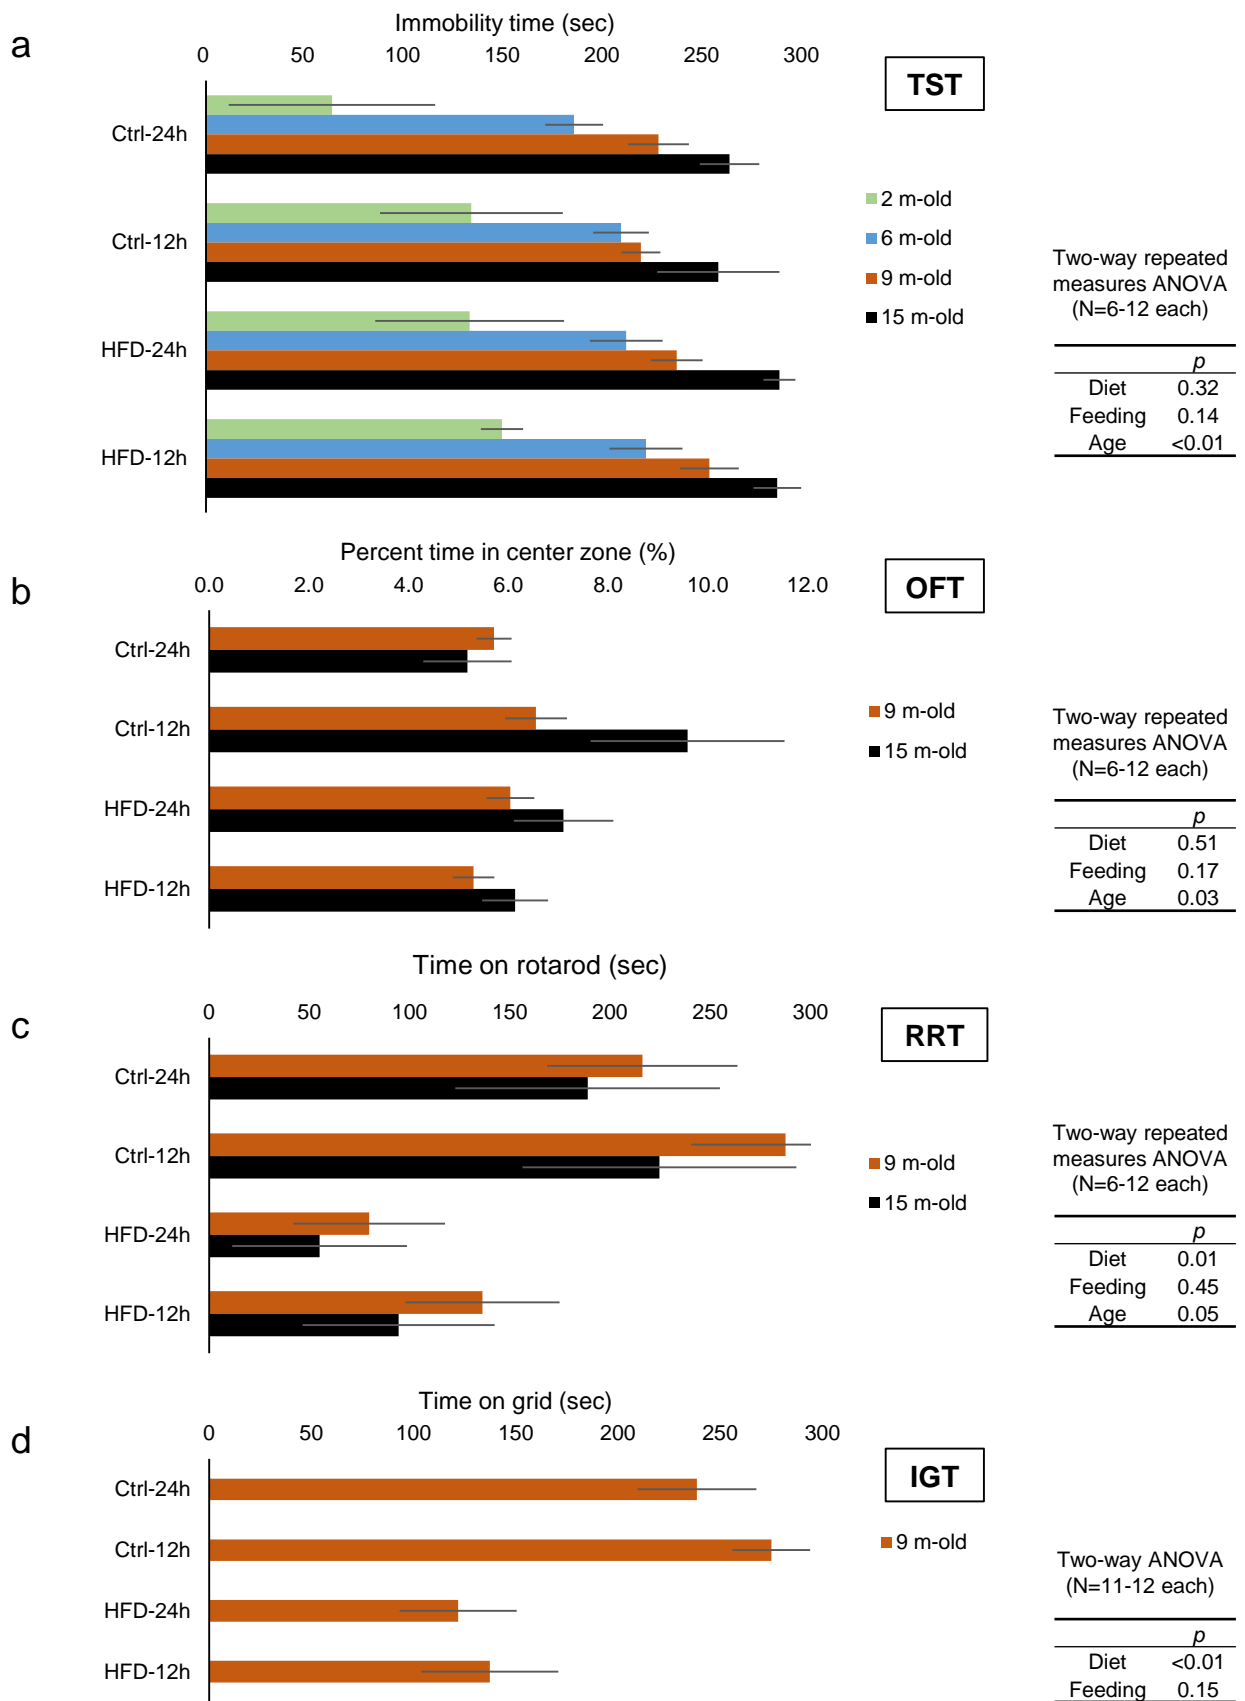

Figure S2. Results of tail suspension test (TST), open field test (OFT), rotarod test (RRT), and inverted grid test (IGT)
