# Supplementary material for: Long-Term Feeding of a High-Fat Diet Ameliorated Age-Related Phenotypes in SAMP8 Mice
Source: MDPI journal article supplement (doi:10.3390/nu12051416), 2020-05-14
Supplement: s1 [file s1]

a

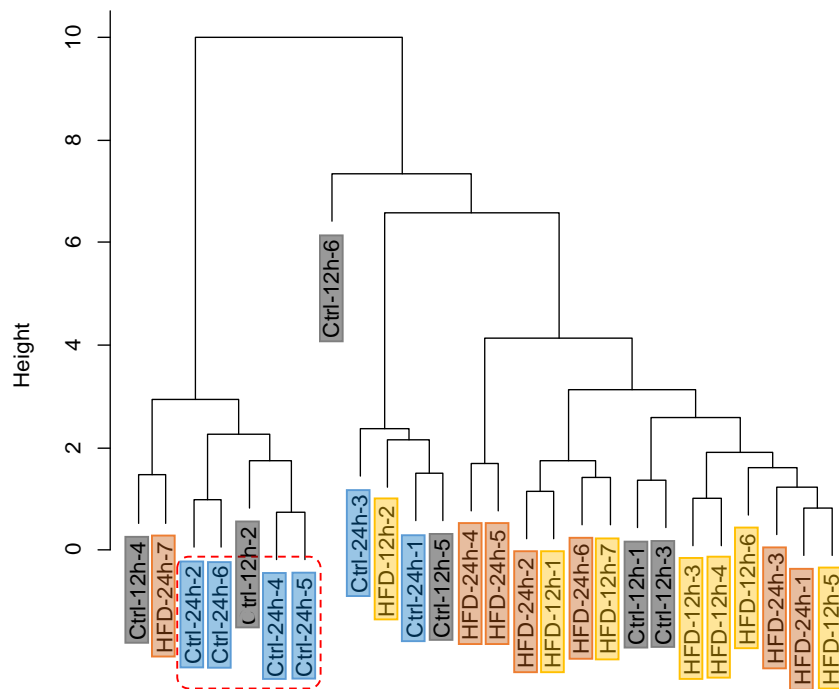

b

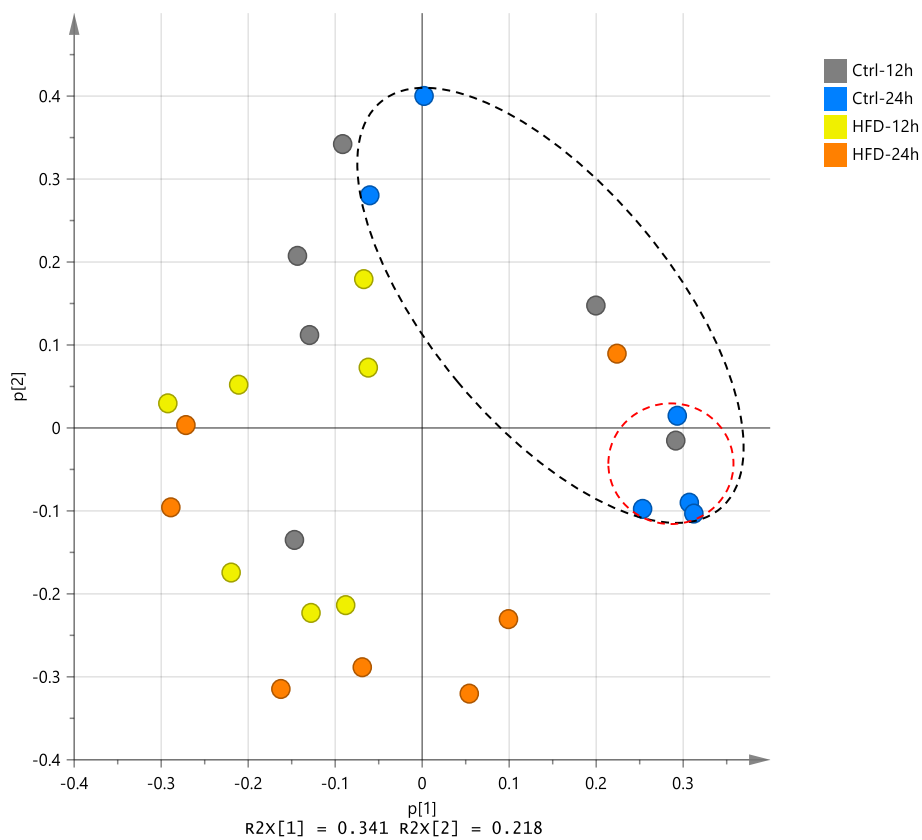

Figure S3. Hierarchical cluster analysis (a) and PCA analysis (b) about hepatic gene expressions. Four out of six mice or all six mice in Ctrl-24h group were assigned to the same cluster (a) or close distance (b), respectively.
