# Supplementary material for: Long-Term Feeding of a High-Fat Diet Ameliorated Age-Related Phenotypes in SAMP8 Mice
Source: MDPI journal article supplement (doi:10.3390/nu12051416), 2020-05-14
Supplement: s1 [file s1]

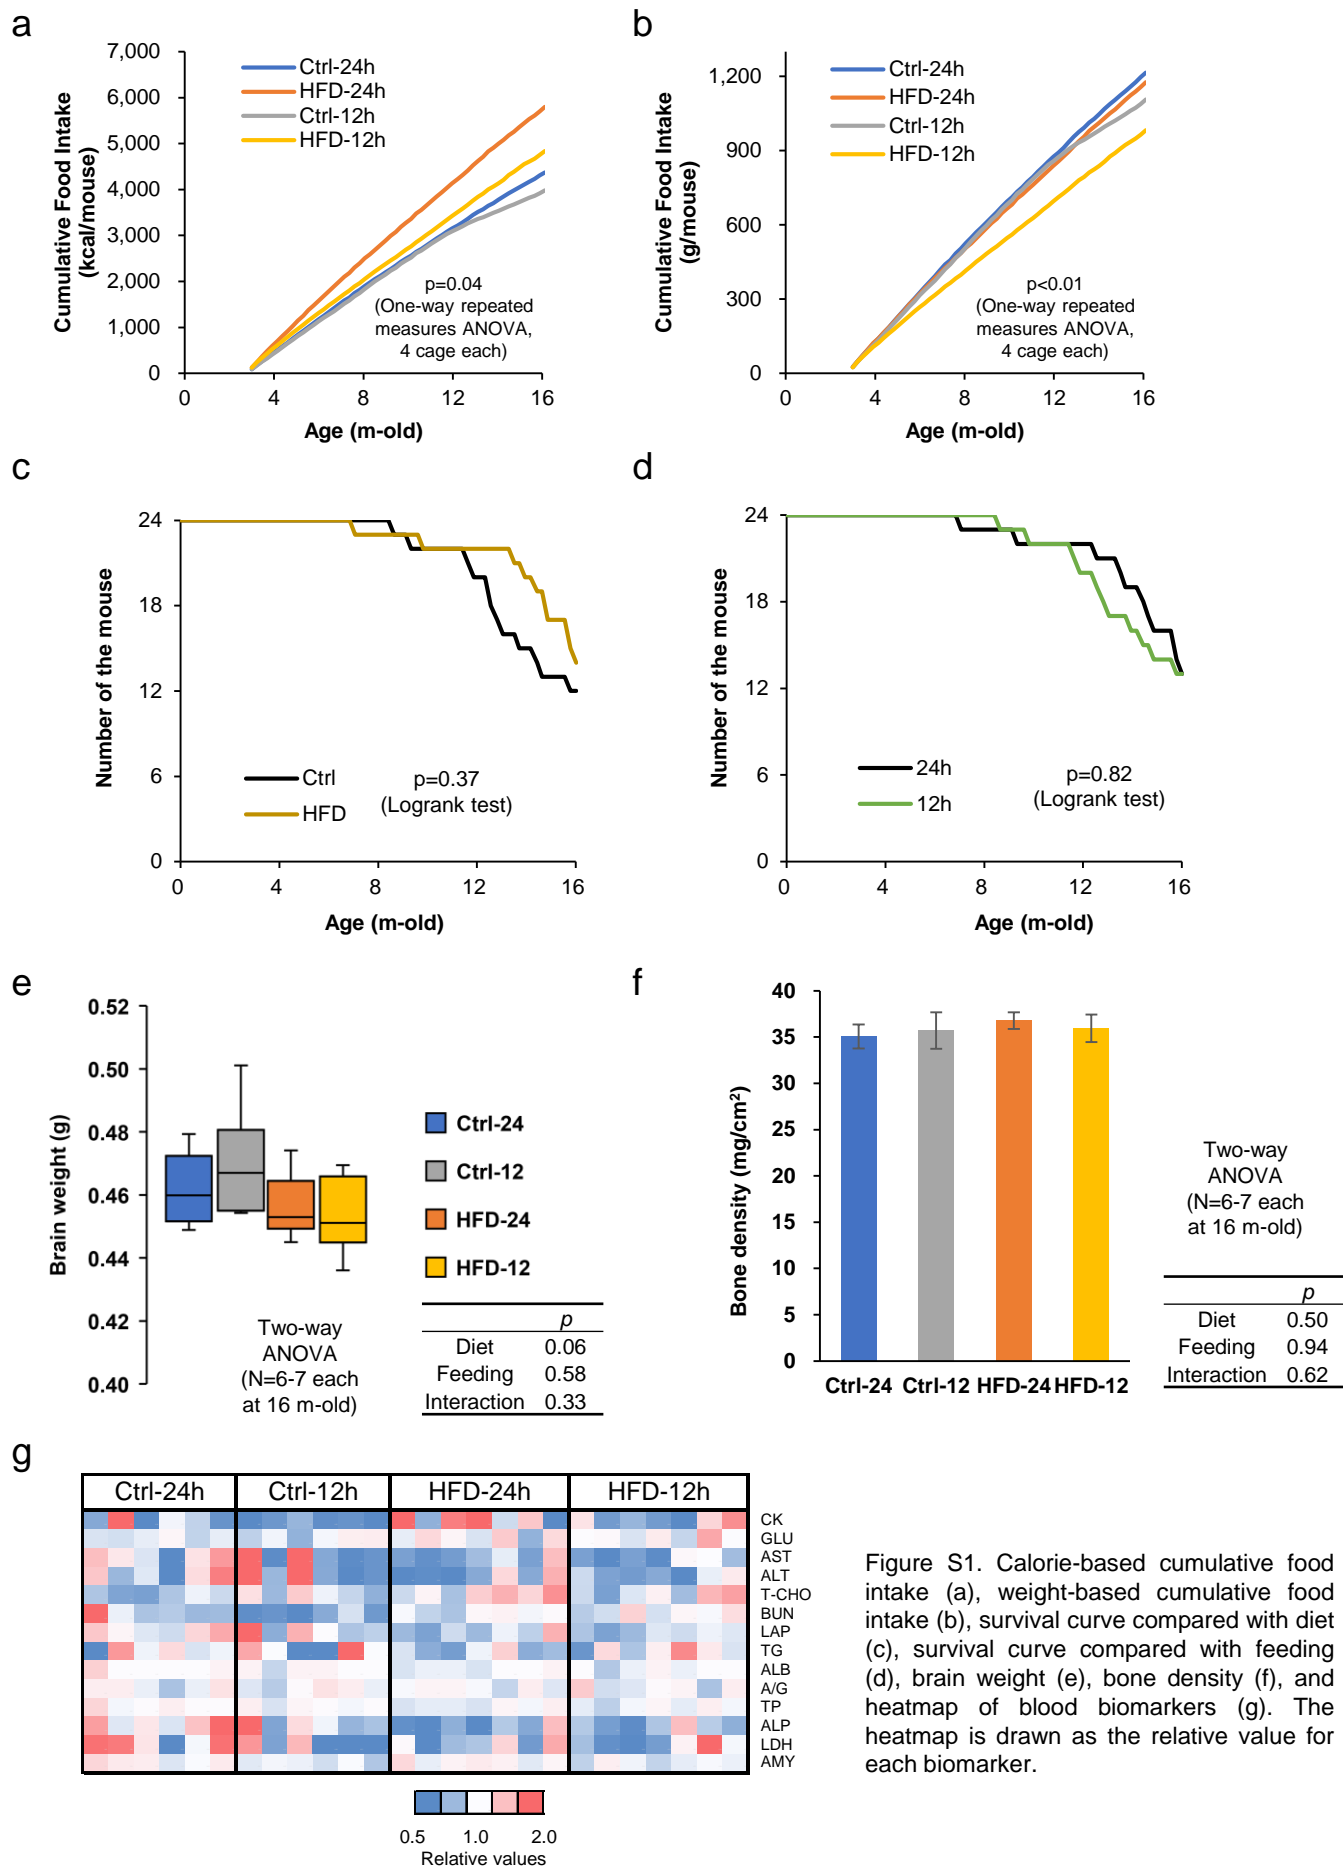

Figure S1. Calorie-based cumulative food intake (a), weight-based cumulative food intake (b), survival curve compared with diet (c), survival curve compared with feeding (d), brain weight (e), bone density (f), and heatmap of blood biomarkers (g). The heatmap is drawn as the relative value for each biomarker.
